# Supplementary material for: Polymersomal delivery enhances third-generation photodynamic therapy with the first white-light-activated peptide photosensitiser for melanoma
Source: Royal Society of Chemistry journal article supplement (doi:10.1039/d5pm00259a), 2025-12-16
Supplement: d5pm00259a1.pdf [file d5pm00259a1.pdf]

## SUPPLEMENTARY DATA

### **Polymersomal Delivery Enhances Third-Generation Photodynamic Therapy with the First White-Light-Activated Peptide Photosensitiser for Melanoma**

Talat Nahid Khan<sup>1,2</sup>, Mohammed Naeem Khan<sup>1,2</sup>, Poullette R Oduor<sup>2</sup>, Heather Nesbitt<sup>1</sup>, Thomas McKaig<sup>1</sup>, Anthony P McHale<sup>1</sup>, John F Callan<sup>1</sup> and Bridgeen Callan<sup>1,2\*</sup>.

1. Biomedical Sciences Research Institute, University of Ulster, Coleraine, Northern Ireland, UK, BT52 1SA.
2. Klas Therapeutics Limited, c/o 50 Bedford Street, Belfast, Northern Ireland, UK, BT27FW.

\*address for correspondence b.callan@ulster.ac.uk

#### **Contents:**

S1: MTT viability assay with varying concentrations of Rose Bengal in B16 melanoma cells.

S2: MTT viability assay with varying concentrations of polymersomal Rose Bengal in B16 melanoma cells.

S3: MTT viability assay of varying concentrations of polymersomal Rose Bengal with the addition of the K2 peptide (non conjugated).

S4: Singlet oxygen sensor green (SOSG) investigation of light activated reactive oxygen species (ROS) generation in B16 melanoma cells incubated with either RB-K2 or PS-RB-K2.

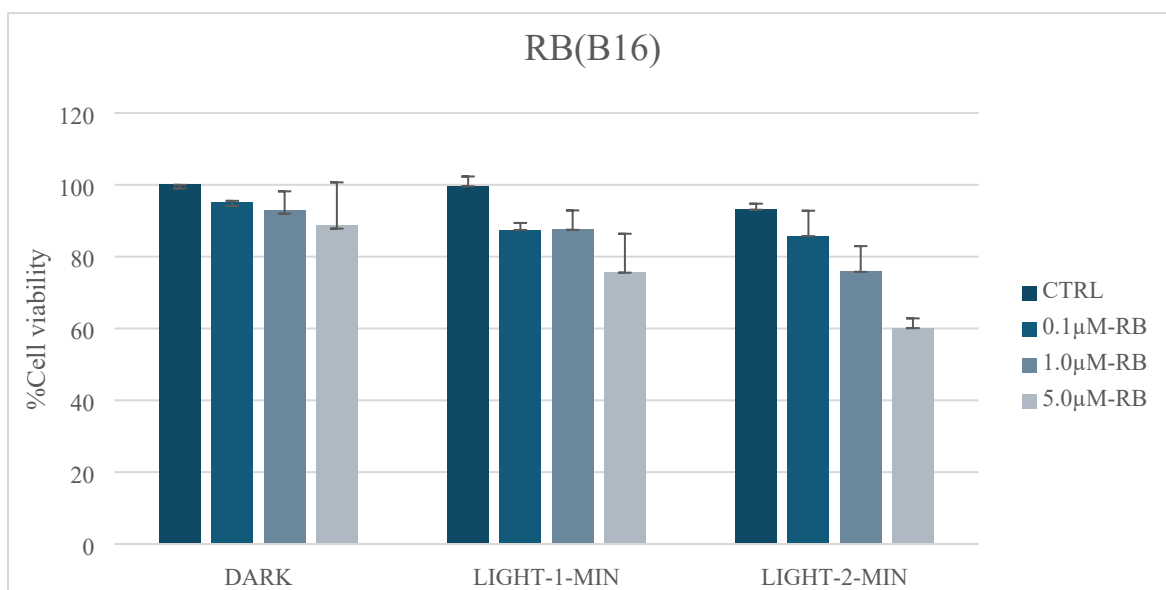

**S1:** MTT viability assay of B16 cells incubated with 0.1, 1.0 and 5.0μM Rose Bengal for 3 hrs, following which time the media containing RB was removed and the cells washed twice with PBS with fresh media added followed by either no light, 1min light or 2 min light exposure (Fenix LD01 LED, 50 mW output). Following light treatment cells were maintained at 37°C, 5/20/75 CO<sub>2</sub>/O<sub>2</sub>/air overnight before an MTT assay was carried out.

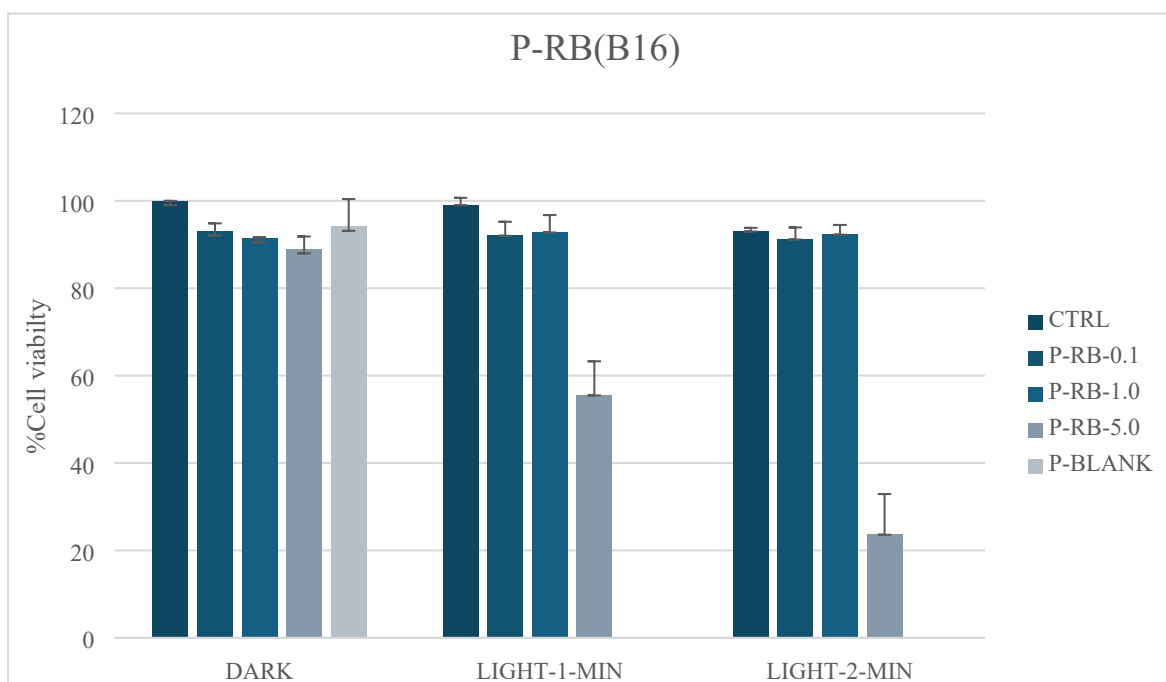

**S2:** MTT viability assay of B16 cells incubated with 0.1, 1.0 and 5.0μM Rose Bengal contained within polymersomes (0.065mg/ml) for 3 hrs, following which time the media containing P-RB was removed and the cells washed twice with PBS with fresh media added followed by either no light, 1min light or 2 min light exposure (Fenix LD01 LED, 50 mW output). Following light

treatment cells were maintained at 37°C, 5/20/75 CO<sub>2</sub>/O<sub>2</sub>/air overnight before an MTT assay was carried out.

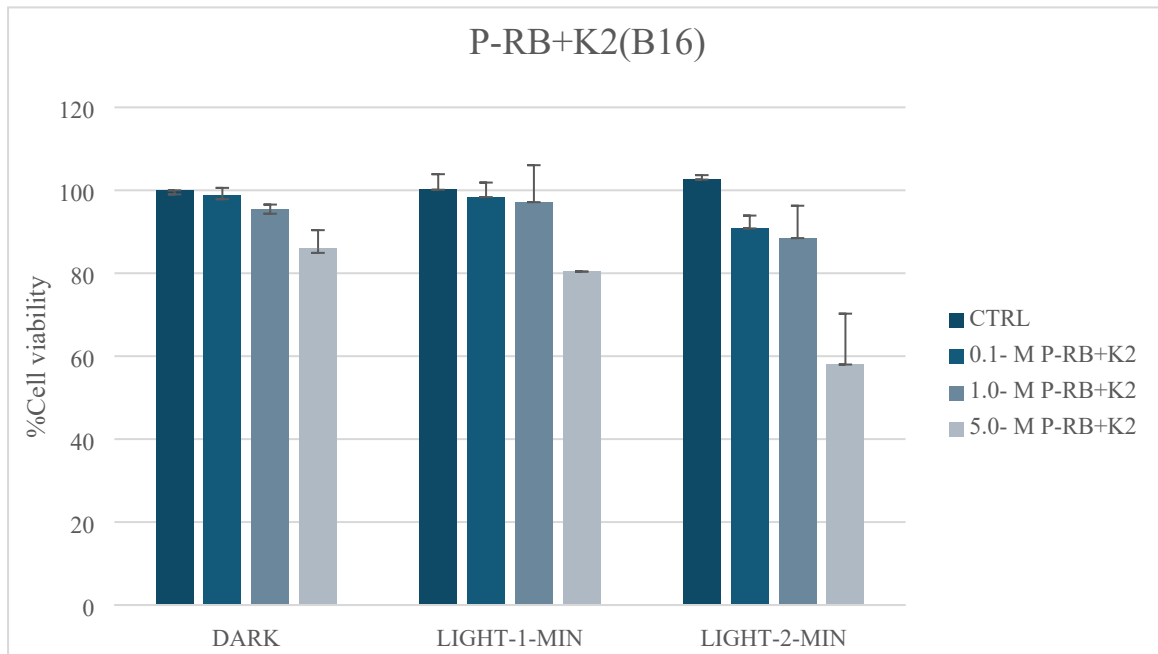

**S3:** MTT viability assay of B16 cells incubated with 0.1, 1.0 and 5.0 $\mu$ M Rose Bengal and 0.1, 1.0 and 5.0 $\mu$ M K2 contained within polymersomes (0.065mg/ml) for 3 hrs, following which time the media containing P-RB+K2 was removed and the cells washed twice with PBS with fresh media added followed by either no light, 1min light or 2 min light exposure (Fenix LD01 LED, 50 mW output). Following light treatment cells were maintained at 37°C, 5/20/75 CO<sub>2</sub>/O<sub>2</sub>/air overnight before an MTT assay was carried out.

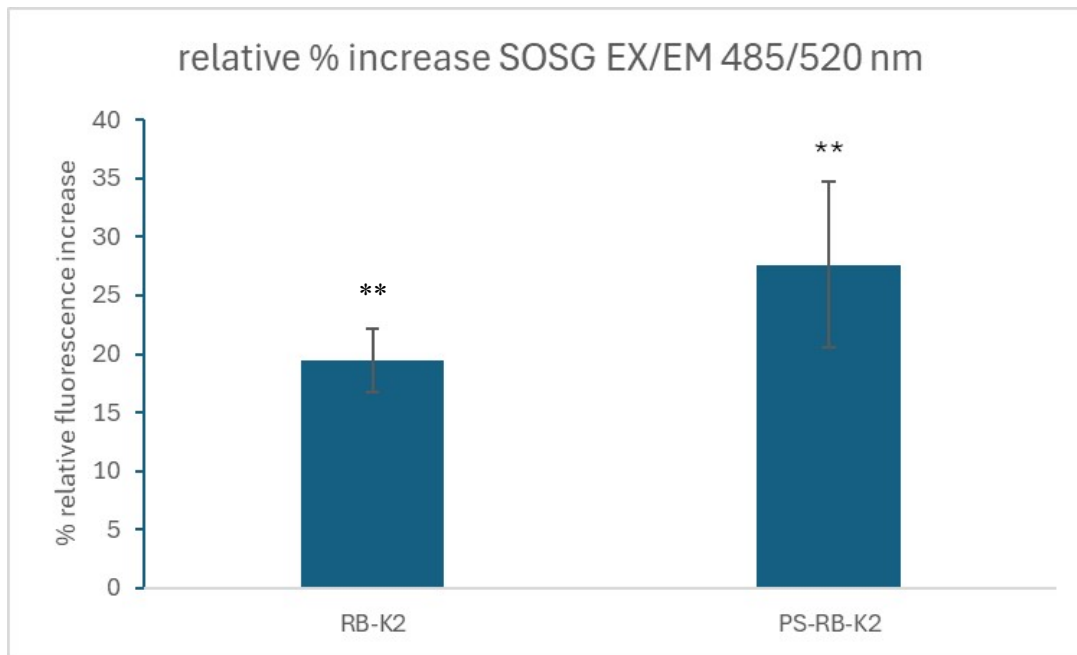

**S4.** B-16 melanoma cells were incubated with either no drug, 10  $\mu$ M of RB-K2 or 10  $\mu$ M PS-RB-K2 for 3 hrs at 37°C, 5/20/75 CO<sub>2</sub>/O<sub>2</sub>/air following which time the cells were washed twice with PBS with fresh media added along with 10 $\mu$ M singlet oxygen sensor green (SOSG) with a further 1 hr incubation at the conditions stated. The cells were again washed twice with PBS and fresh media added before being subjected to 90 secs light (Fenix LD01 LED, 50 mW output). The fluorescent emission was recorded on a Fluostar Omega microplate reader at Ex 480 nm/Em 520 nm with the graph presented as a relative % increase from the cells subjected to light and SOSG only.
